# Supplementary material for: Atmospheric rivers moisture sources from a Lagrangian perspective
Source: Copernicus journal article supplement (doi:10.5194/esd-7-371-2016), 2016-04-22
Supplement: Supplementary file 1 [file esd-7-371-2016-supplement.pdf]

Supplement of Earth Syst. Dynam., 7, 371–384, 2016  
<http://www.earth-syst-dynam.net/7/371/2016/>  
doi:10.5194/esd-7-371-2016-supplement  
© Author(s) 2016. CC Attribution 3.0 License.

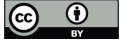

*Supplement of*

## **Atmospheric rivers moisture sources from a Lagrangian perspective**

**A. M. Ramos et al.**

*Correspondence to:* Alexandre M. Ramos (amramos@fc.ul.pt)

The copyright of individual parts of the supplement might differ from the CC-BY 3.0 licence.

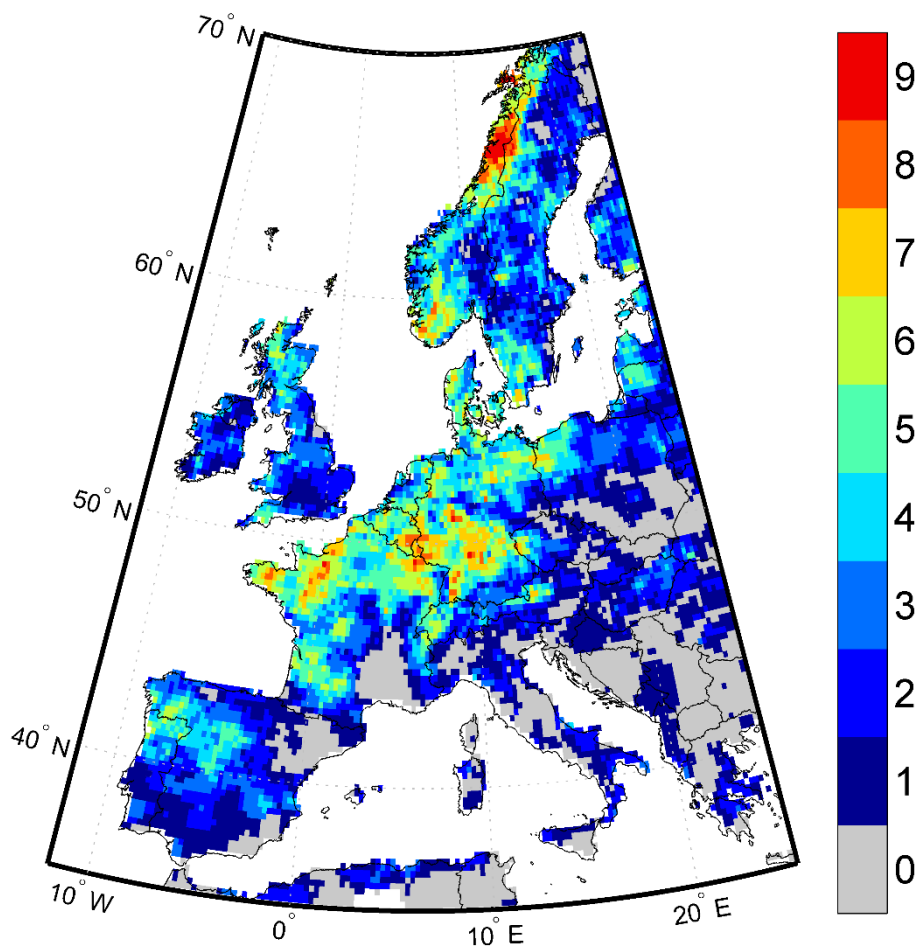

**Figure S1.** The number of Top 10 annual maxima precipitation events (for the extended winter months) related to Atmospheric Rivers.

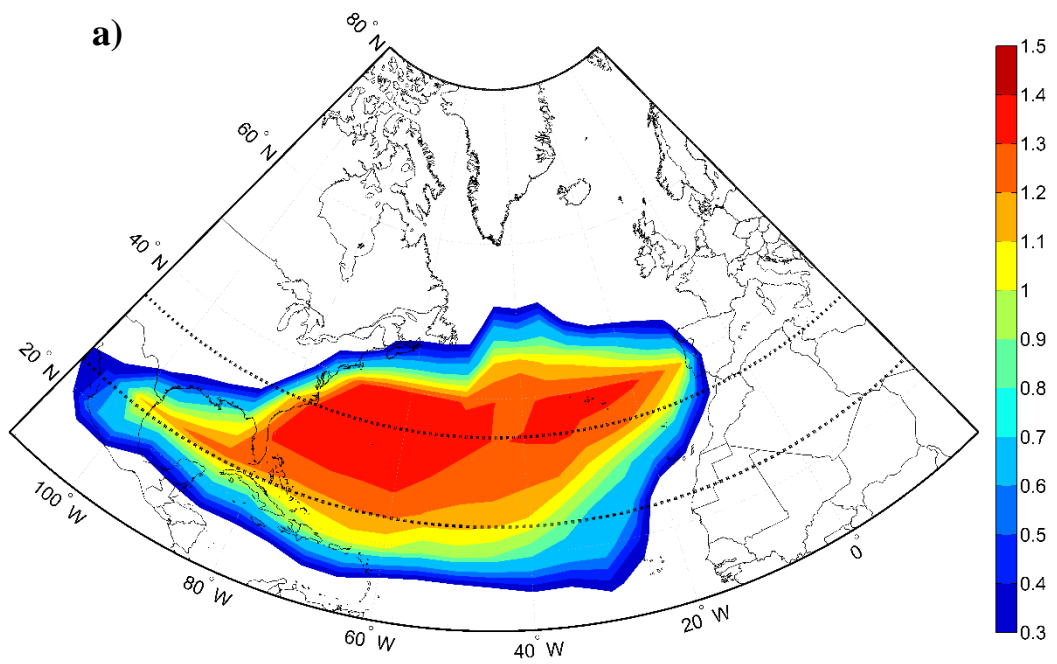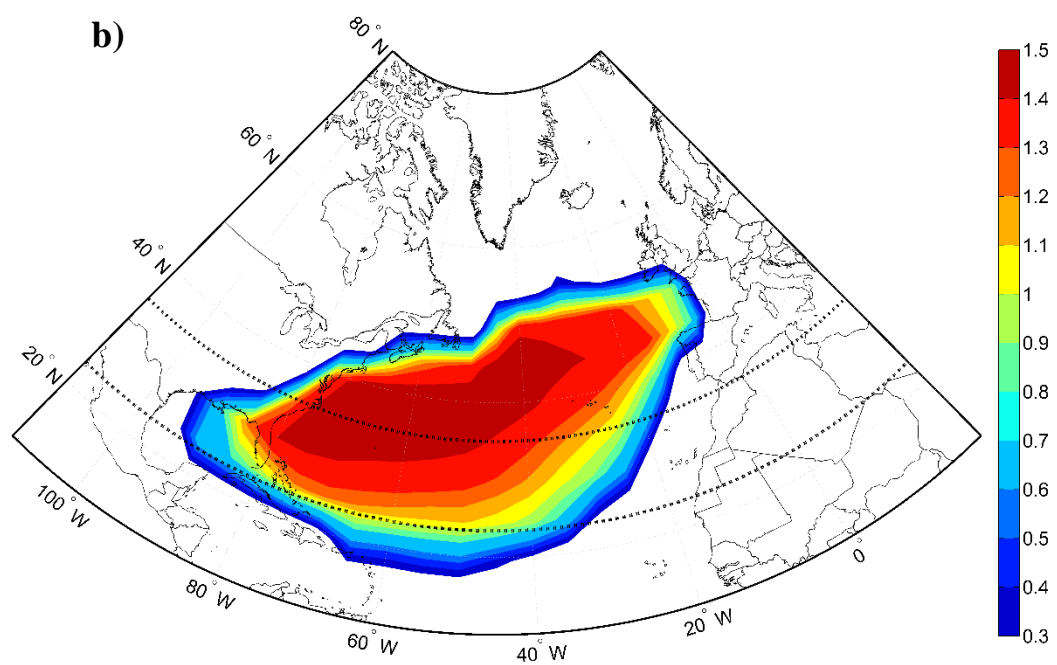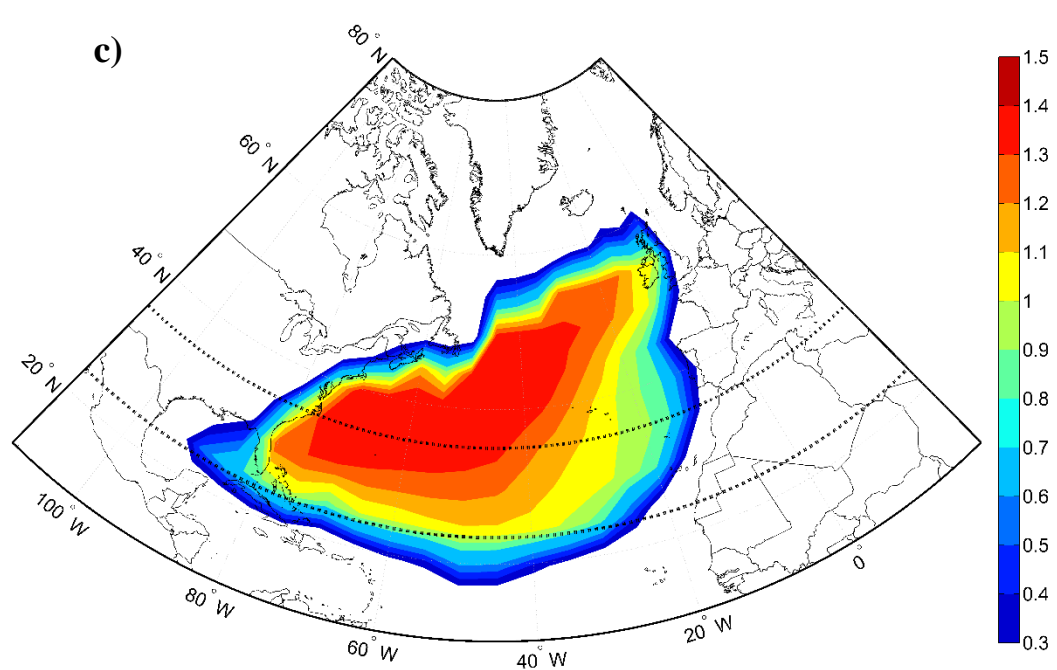

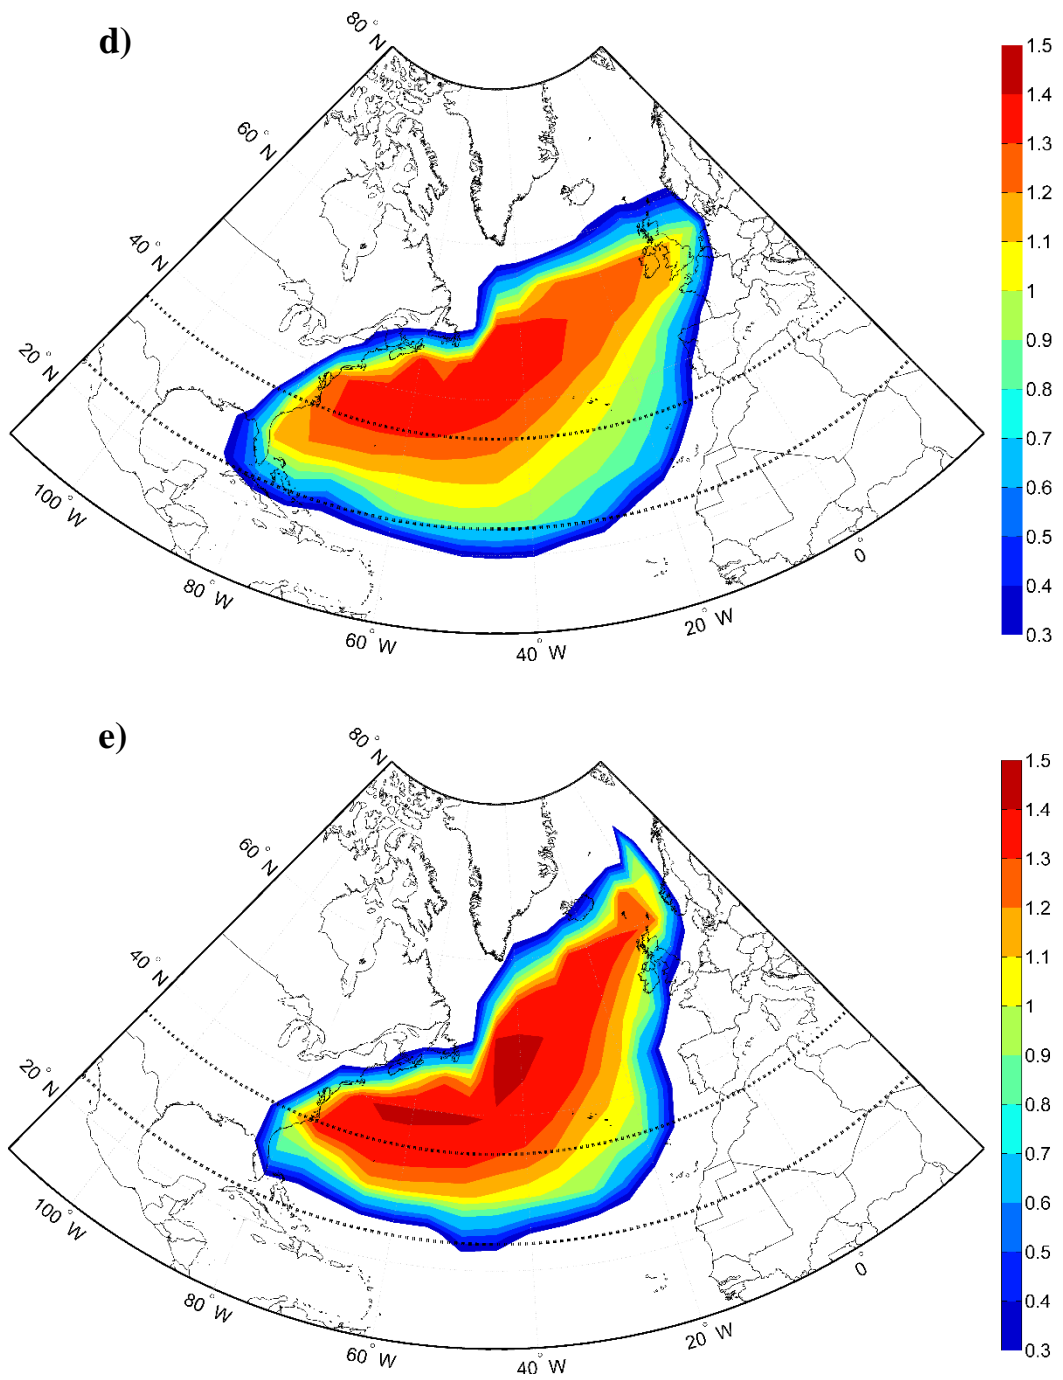

**Figure S2.** Track density (%) of the air parcels used to compute the anomalous moisture uptake (at a 5° by 5° grid cell) for a) Iberian Peninsula, b) France, c) UK, d) South Scandinavia and the Netherlands, and e) North Scandinavia.

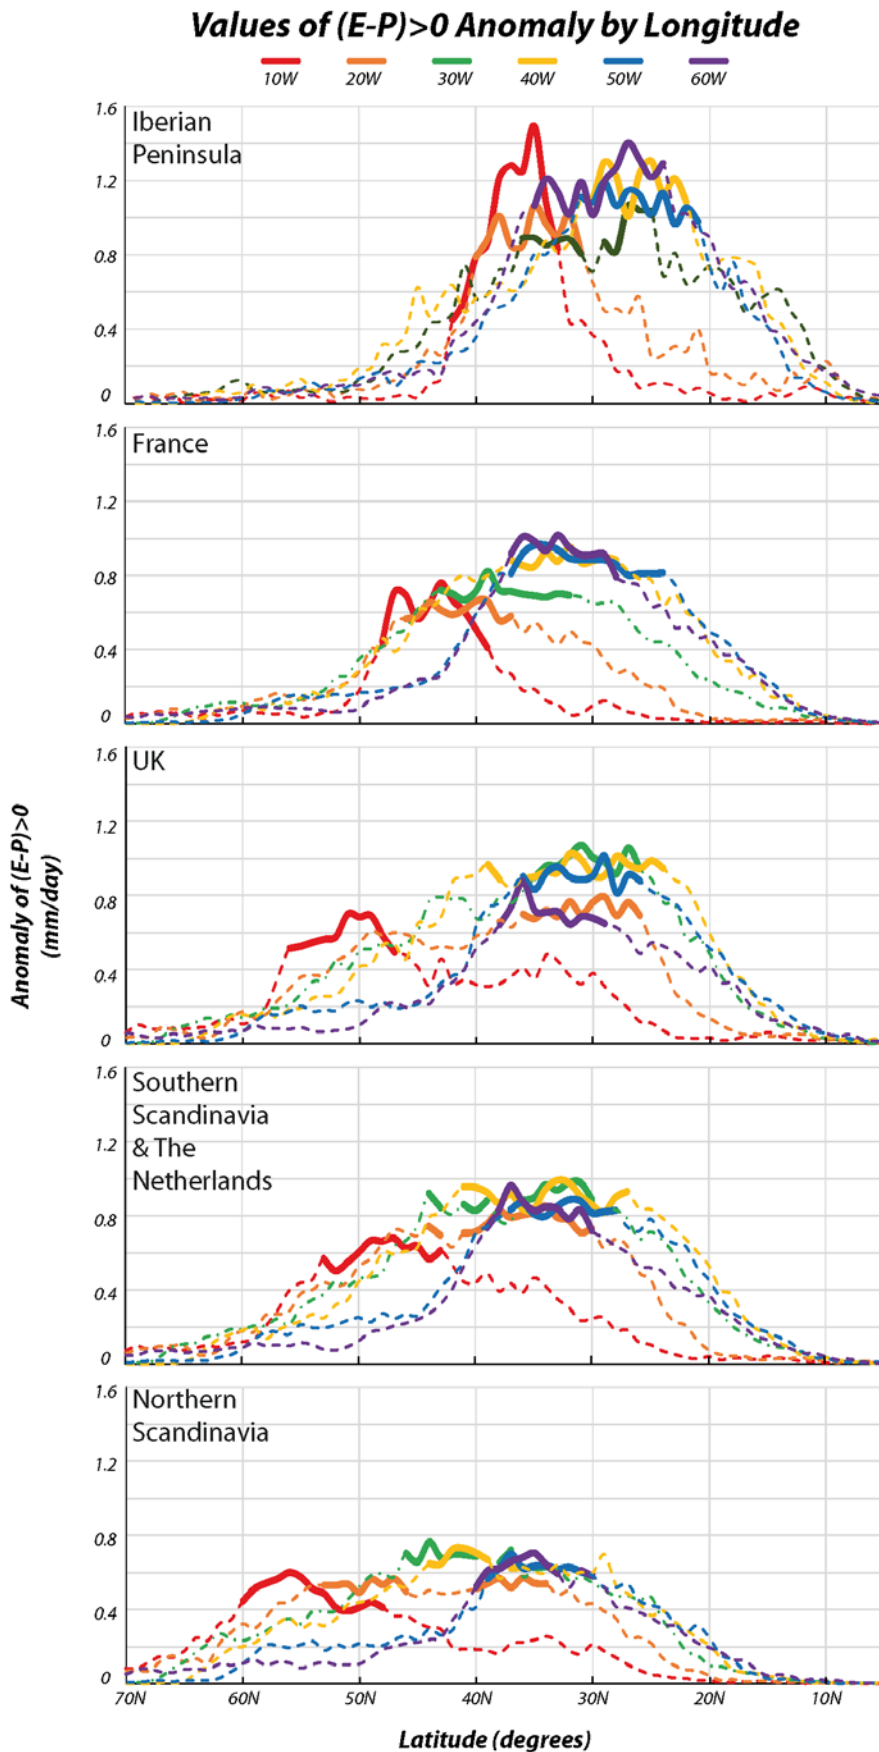

**Figure S3.** Longitudinal cross section of the anomaly values of  $(E-P) > 0$  field  $[(E-P)An]$  for each studied domain every 10 degrees:  $10^{\circ}W$  (red line),  $20^{\circ}W$  (orange),  $30^{\circ}W$  (green),  $40^{\circ}W$  (yellow),  $50^{\circ}W$  (blue), and  $60^{\circ}W$  (purple). The bold line shows those values over the 90th percentile of each series (values shown in Table 4). Units in mm/day.
